# Supplementary material for: C-terminal armadillo repeats are essential and sufficient for association of the plant U-box armadillo E3 ubiquitin ligase SAUL1 with the plasma membrane
Source: PubMed Central journal article supplement — J Exp Bot. 2010 Oct 18;62(2):775–85. doi: 10.1093/jxb/erq313 (PMC3003819; doi:10.1093/jxb/erq313), 2010-10-18
Supplement: supp_erq313_00053090-file001.pdf [file supp_erq313_00053090-file001.pdf]

Figure S1

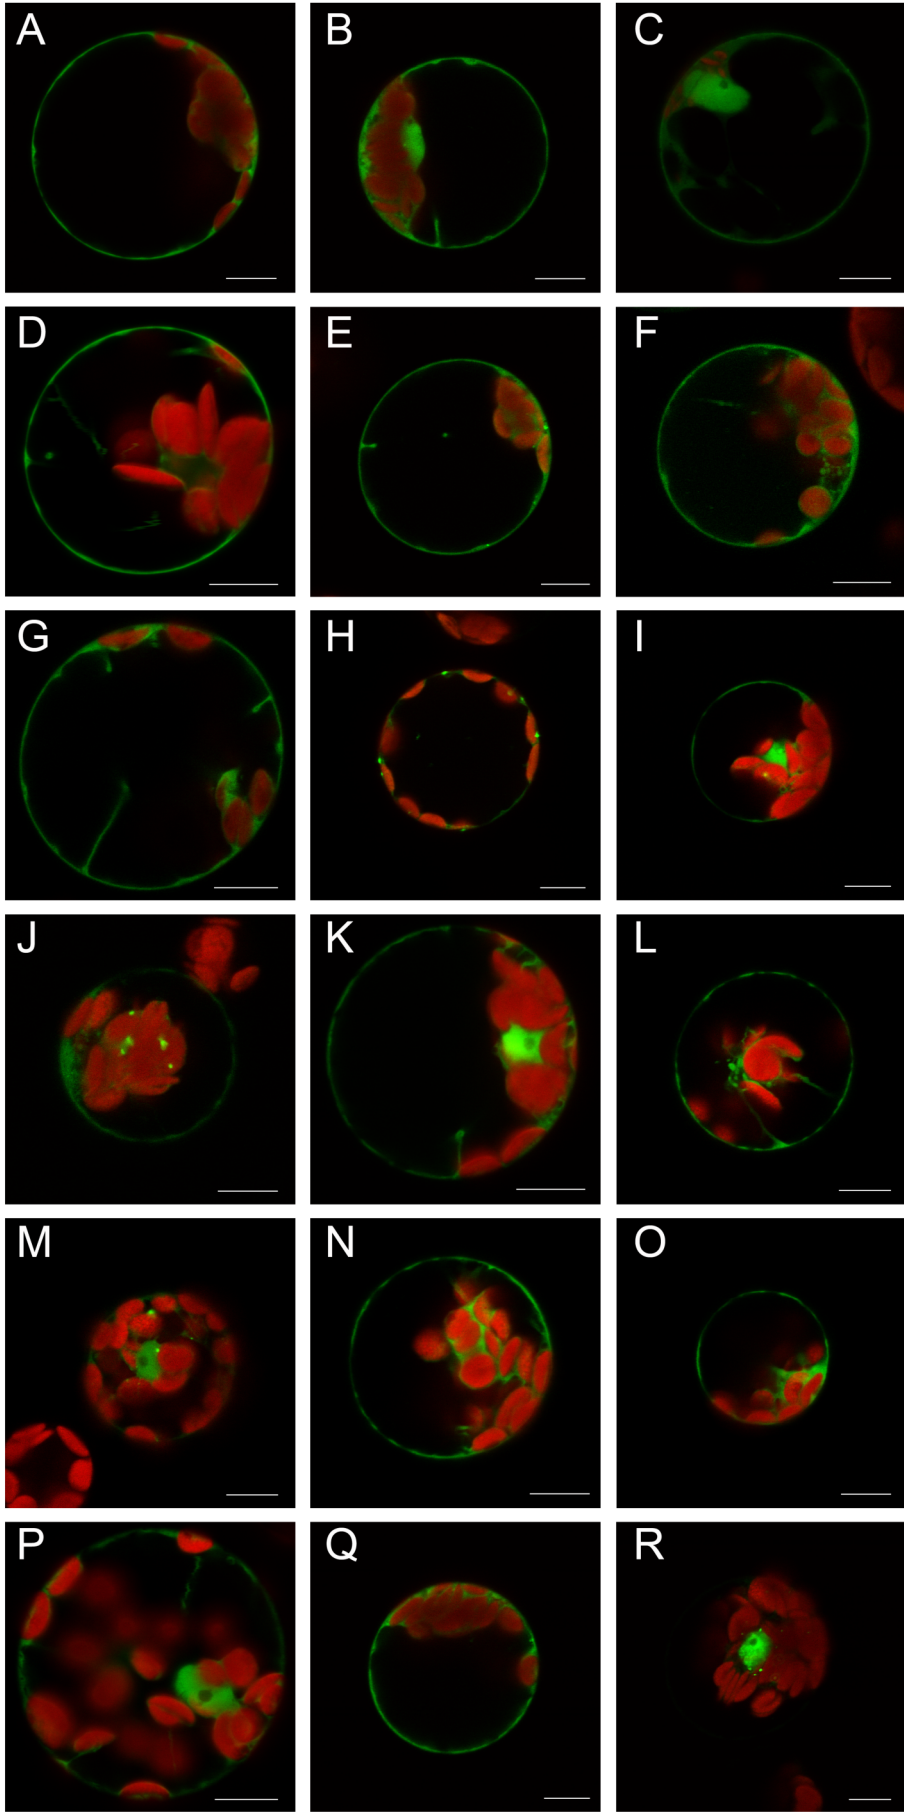

**Fig. S1.** Subcellular Localization of PUB-ARM proteins. Transformation of Arabidopsis protoplasts followed by analyses of GFP fluorescence signals by confocal laser scanning microscopy indicated localization of GFP-PUB2 (A), GFP-PUB3 (B), GFP-PUB5 (C), GFP-PUB7 (D), GFP-PUB10 (E), GFP-PUB11 (F), GFP-PUB14 (G), GFP-PUB17 (H), GFP-PUB18 (I), GFP-PUB20 (J), GFP-PUB26 (K), GFP-PUB27 (L), GFP-PUB29 (M), GFP-PUB30 (N), GFP-PUB40 (O), GFP-PUB41 (P), GFP-PUB45 (Q), and GFP-PUB48 (R) fusion proteins in intracellular structures other than the plasma membrane, in most cases cytoplasm and/ or nucleus. Autofluorescence of chlorophyll is shown in red. Scale bars represent 10  $\mu\text{m}$ .
