# Supplementary material for: C-terminal armadillo repeats are essential and sufficient for association of the plant U-box armadillo E3 ubiquitin ligase SAUL1 with the plasma membrane
Source: PubMed Central journal article supplement — J Exp Bot. 2010 Oct 18;62(2):775–85. doi: 10.1093/jxb/erq313 (PMC3003819; doi:10.1093/jxb/erq313), 2010-10-18
Supplement: supp_erq313_00053090-file002.pdf [file supp_erq313_00053090-file002.pdf]

**Table S1.** Primers used for amplification of *PUB-ARM* full-length fragments.

| <b>Gene of interest</b> | <b>Primer #1</b>                   | <b>Primer #2</b>                        |
|-------------------------|------------------------------------|-----------------------------------------|
| <i>SAUL1 + STOP</i>     | 5' CACCATGGTTGGAAGCTCGGATG 3'      | 5' GTTTTAATTAACATGCGATGTTTGGGAATATAC 3' |
| <i>SAUL1</i>            | 5' CACCATGGTTGGAAGCTCGGATG 3'      | 5' GATGGTACCTGCGATGTTTGGGAATATAC 3'     |
| <i>PUB43</i>            | 5' CACCATGGCTGGAAGTGAAGTTG 3'      | 5' GGATCAACCAATGTTGGTGAATATAC 3'        |
| <i>PUB42</i> *          | 5' CACCATGGGAGATACAGACAGCAGAGAG 3' | 5' GGATCAGACATGGACAGAAGCAGAATG 3'       |
| <i>PUB27</i>            | 5' CACCATGAGGAAAGATGATCTCTGC 3'    | 5' GGATCAAAACGGCATGATATGTGTC 3'         |
| <i>PUB7</i> *           | 5' CACCATGGATGTGACCGAGCTTG 3'      | 5' GGATCACTCGCGAACCGAGTAG 3'            |
| <i>PUB45</i> *          | 5' CACCATGGATGTTAATGAGGTTGAAG 3'   | 5' GGATCAACACTGGTAACTGAGAAGCTC 3'       |
| <i>PUB17</i>            | 5' CACCATGGCCTCAGCGGC 3'           | 5' GGATCACAACACTGGTACGGAGATTG 3'        |
| <i>PUB11</i> *          | 5' CACCATGGCCGGAGGAATC 3'          | 5' GGATCATTGGCATGCTTTACGAAG 3'          |
| <i>PUB10</i> *          | 5' CACCATGGCTGGTGGAGCTATC 3'       | 5' GGATCAGAGTGAACCTAATTTTCGG 3'         |
| <i>PUB14</i> *          | 5' CACCATGGGATTAACGAATTGTTGTTG 3'  | 5' GGATCCTGGAACAGTAGTTACTGCAACAC 3'     |
| <i>PUB2</i> *           | 5' CACCATGATGGTACATATGGAGGTGTC 3'  | 5' GGATCAGCCTCTCCTCTGATTGC 3'           |
| <i>PUB3</i> *           | 5' CACCATGGATCCTGTTCTGTTGTCG 3'    | 5' GGATCATGATCTACCTTTCTTCATCCTTG 3'     |
| <i>PUB48</i> *          | 5' CACCATGGCGGATTCGACG 3'          | 5' GGATCAATAGTTAATACACTGTAAATCCC 3'     |
| <i>PUB18</i>            | 5' CACCATGATCCATACGAAAACCG 3'      | 5' GGATCACCAGGCGTGAACGAAC 3'            |
| <i>PUB29</i>            | 5' CACCATGGGGAGAGATGAAACAGAG 3'    | 5' GGATCAAAAAGGCATAATATGAGTAGTCTTG 3'   |
| <i>PUB27</i>            | 5' CACCATGAGGAAAGATGATCTCTGC 3'    | 5' GGATCAAAACGGCATGATATGTGTC 3'         |
| <i>PUB30</i>            | 5' CACCATGCCGATGTTTCAGCC 3'        | 5' GGATCATTGGATTGTCCTTGTGAGTTTG 3'      |
| <i>PUB26</i>            | 5' CACCATGCCGGGAATTTAGAGCC 3'      | 5' TCAAAACGGCGCCACTTCGCTACG 3'          |
| <i>PUB20</i>            | 5' CACCATGGGACTTTCATTGAGAGT 3'     | 5' TTAATGGTTTCTTAACATG 3'               |
| <i>PUB5</i> *           | 5' CACCATGAGGATCGATTACACAGAACG 3'  | 5' GGATCATTTTTTCTTCTTCTTGAGACTGG 3'     |
| <i>PUB40</i>            | 5' CACCATGGAGATTCAACGACCGATC 3'    | 5' GGATCAAAACTCGCCGAGTTAAC 3'           |
| <i>PUB41</i>            | 5' CACCATGGGTGGAACAAGCAGAG 3'      | 5' GGATCAGAAGTGGGAGGAATAAGC 3'          |

\* for amplification of genomic fragments

**Table S2.** Primers used for amplification of *SAUL1* deletion fragments.

| <b>Fragment of interest</b>     | <b>Primer #1</b>                                                                                                         | <b>Primer #2</b>                                                                                                                |
|---------------------------------|--------------------------------------------------------------------------------------------------------------------------|---------------------------------------------------------------------------------------------------------------------------------|
| <i>SAUL1</i> $\Delta N$         | 5' CACCATGCACCATGTGGAGATCCAGGAATGATG 3'                                                                                  | 5' GTTTTAATTAACATATGCGATGTTTGGGAATATAC 3'                                                                                       |
| <i>SAUL1</i> $\Delta C$         | 5' CACCATGGTTGGAAGCTCGGATG 3'                                                                                            | 5' CTACAGGCTCTGTTCCCTCTGCCAC 3'                                                                                                 |
| <i>SAUL1</i> $\Delta N\Delta C$ | 5' CACCATGCACCATGTGGAGATCCAGGAATGATG 3'                                                                                  | 5' CTACAGGCTCTGTTCCCTCTGCCAC 3'                                                                                                 |
| <i>SAUL1</i> $\Delta ARM1-6$    | 5' CAC CAT GAT TAG CAA CAC AGG TC 3'                                                                                     | 5' GGA TCM TGC GAT GTT TGG GAA TAT AC 3'                                                                                        |
| <i>SAUL1</i> $\Delta ARM7-11$   | 5' CAC CAT GGT TGG AAG CTC GGA TG 3'                                                                                     | 5' GGA TCM TAG ATG GAG CAG ATT CTC 3'                                                                                           |
| <i>SAUL1</i> $\Delta ARM7/8$    | 5' CAC CAT GGT TGG AAG CTC GGA TG 3'<br>5' CTC ACC AGT TGC CCA AAA TTG CCA GAT AGG GAT TTG<br>GGT CTT ACT CAG 3'         | 5' CAA ATC CCT ATC TGG CAA TTT TGG GCA ACT GGT GAG<br>TCC AAC AAG AAC CTC 3'<br>5' GGA TCM TGC GAT GTT TGG GAA TAT AC 3'        |
| <i>SAUL1</i> $\Delta ARM9$      | 5' CAC CAT GGT TGG AAG CTC GGA TG 3'<br>5' CTA GGA TTA CTT TTG TTT TCA ACG AGT CTA TAA AGC<br>TGA CAC GGA TGC CTG ATC 3' | 5' CAT CCG TGT CAG CTT TAT AGA CTC GTT GAA AAC AAA<br>AGT AAT CCT AGC AAG TAT AC 3'<br>5' GGA TCM TGC GAT GTT TGG GAA TAT AC 3' |
| <i>SAUL1</i> $\Delta ARM10/11$  | 5' CAC CAT GGT TGG AAG CTC GGA TG 3'                                                                                     | 5' GGA TCM CAC ACA CGA AAA GAT C 3'                                                                                             |
